# Supplementary material for: Cyclosporine A-resistant CAR-T cells mediate antitumour immunity in the presence of allogeneic cells
Source: PubMed Central journal article supplement (PMC10733396; doi:10.1038/s41467-023-44176-0), 2023-12-20
Supplement: 41467_2023_44176_MOESM1_ESM.pdf [file 41467_2023_44176_MOESM1_ESM.pdf]

**Cyclosporine A-resistant CAR-T cells mediate antitumour immunity in  
the presence of allogeneic cells**

Yixi Zhang, Hongyu Fang, Guocan Wang, Guangxun Yuan, Ruoyu Dong, Jijun  
Luo, Yu Lyu, Yajie Wang, Peng Li, Chun Zhou, Weiwei Yin, Haowen Xiao, Jie  
Sun, Xun Zeng

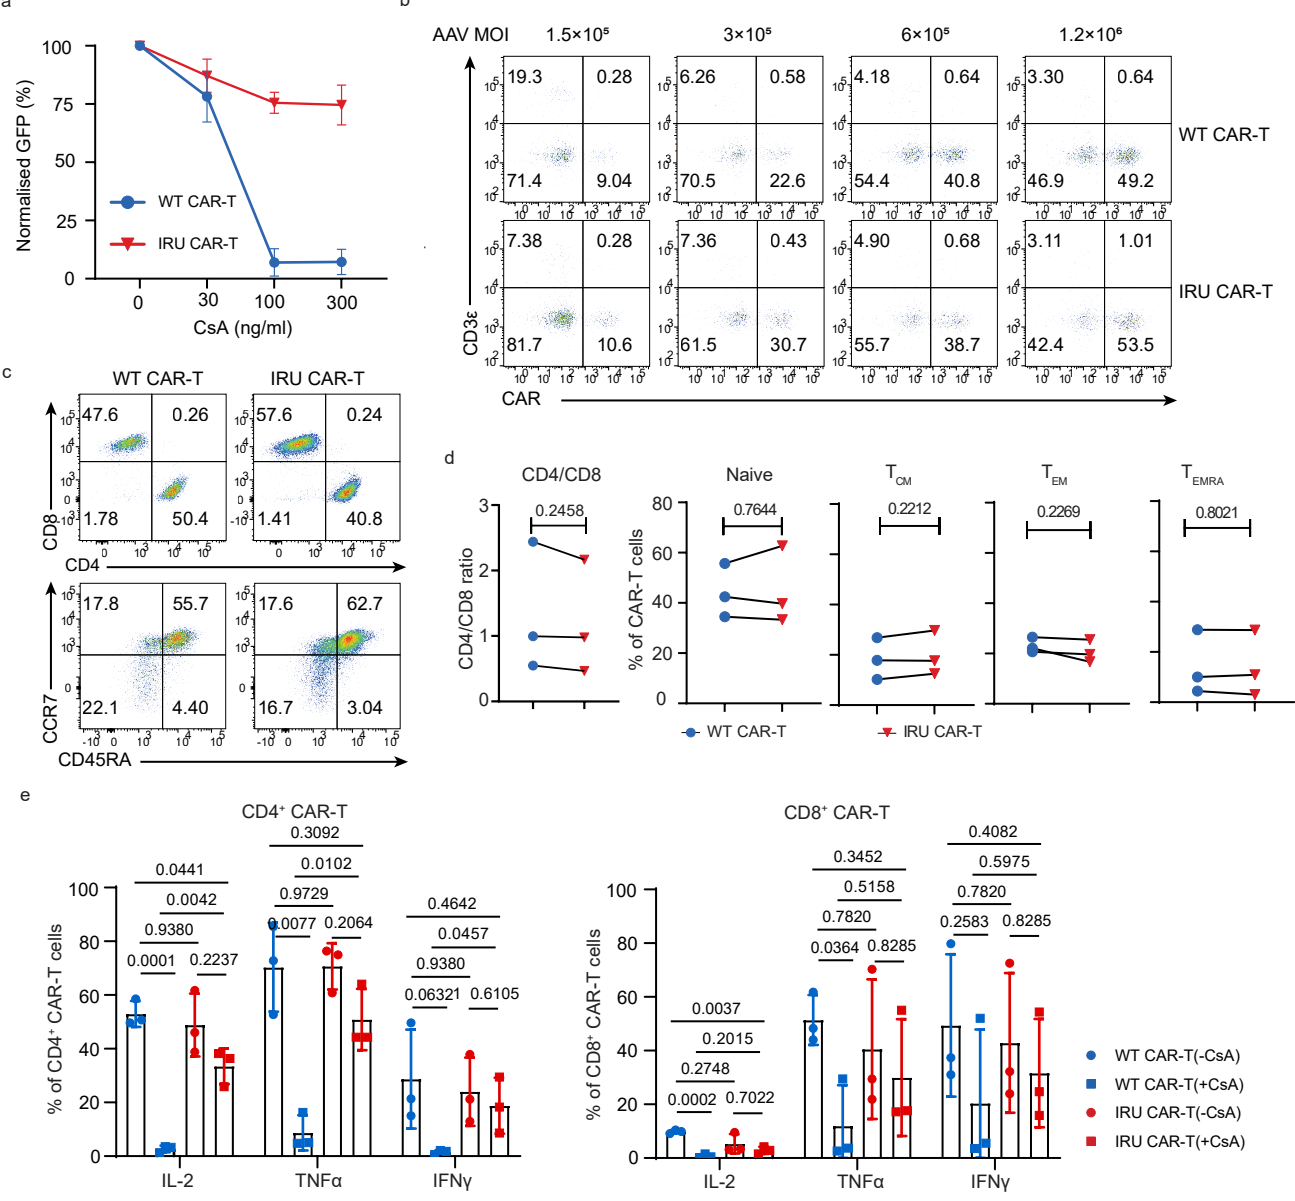

**Supplementary Fig. 1 | IRU CAR-T cells retained effector functions and had the similar starting status of WT CAR-T cells.**  
**a**, Jurkat-NFAT-GFP cells transduced with WT/IRU CARs were stimulated with Nalm6-FFLuc-GFP in the context of dose-escalated CsA (30, 100, 300 ng/ml). The GFP percentages represented the activation of NFAT signaling (n = 3 independent experiments). **b**, Representative flow plots of WT/IRU CAR-T cells 4 days after transfected by AAV6 with escalated multiplicity of infection (MOI). **c,d**, representative flow plots (c) and phenotypes (d) of WT/IRU CAR-T cells before *in vitro* assays and adoptive transfer (n = 3 biologically independent samples). **e**, percentage of CD4<sup>+</sup> (left) and CD8<sup>+</sup> (right) CAR-T cells that expressed cytokines upon the stimulation of Nalm6-FFLuc-GFP (n=3 biologically independent samples). All data are means±s.d, P values were determined by two-tailed paired t test (d) or Multiple t test adjusted by the Holm-Sidak method (a,e). WT CAR-T (-CsA) as blue circle, WT CAR-T (+CsA) as blue square, IRU CAR-T (-CsA) as red circle and IRU CAR-T (+CsA) as red square.

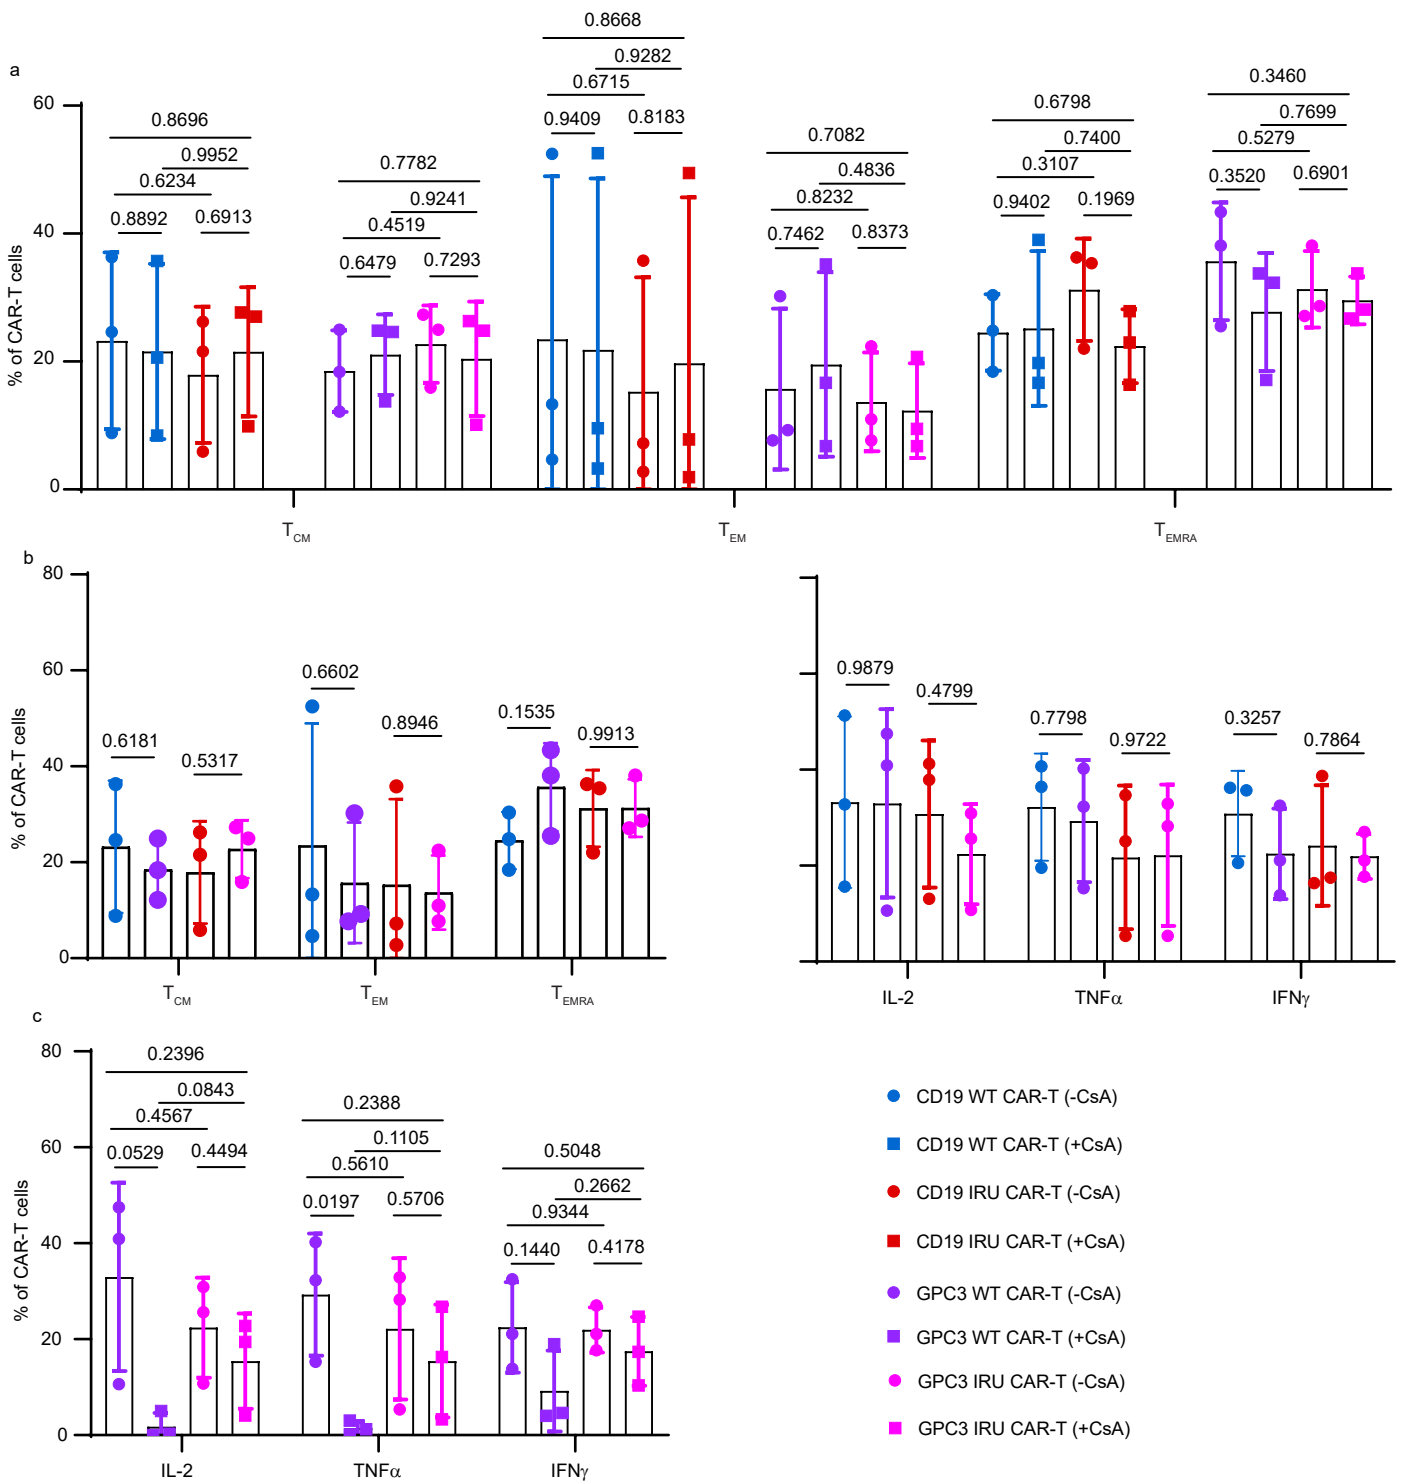

**Supplementary Fig. 2 | Different CAR-T may have different phenotypes, but with similar cytokine production pattern. a**, The phenotype of CD19/GPC3 WT/IRU CAR-T cells with/without CsA, with the stimulation of Nalm6/HepG2 cell line (n=3 biologically independent samples). **b**, The phenotype and cytokine comparison between CD19/GPC3 WT/IRU CAR-T cells in the absence of CsA. **c**, The cytokine production of GPC3 WT/IRU CAR-T cells with/without CsA (n=3 biologically independent samples). All data are means $\pm$ s.d. P values were determined by multiple t test adjusted by the Holm-Sidak method (**a-c**). WT CAR-T (-CsA) as blue circle, WT CAR-T (+CsA) as blue square, IRU CAR-T (-CsA) as red circle and IRU CAR-T (+CsA) as red square.

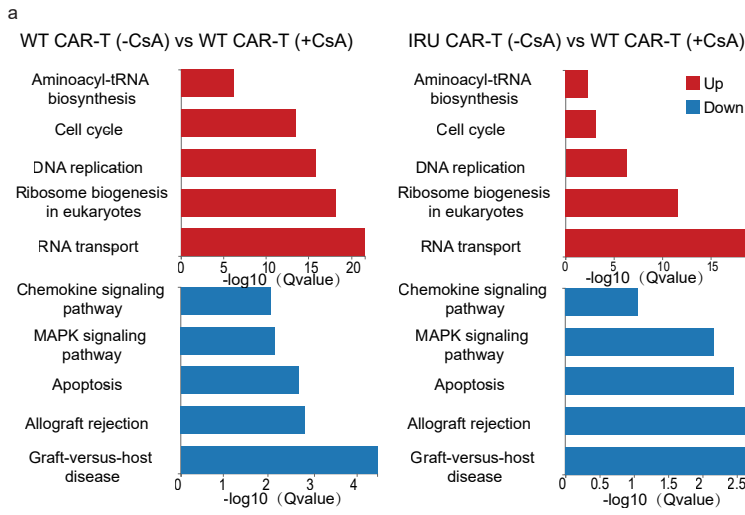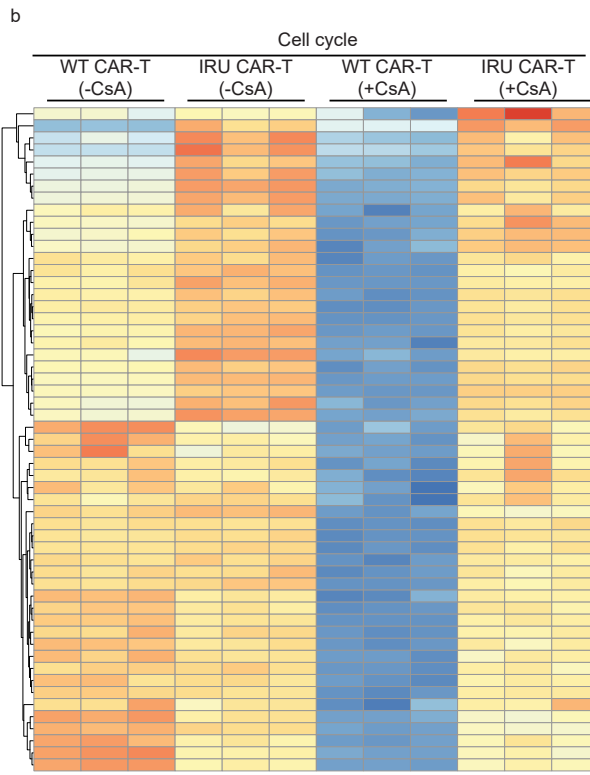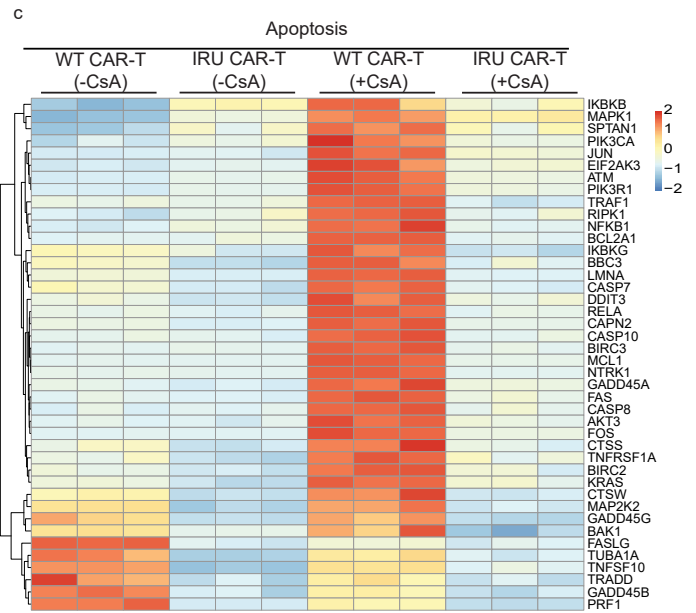

**Supplementary Fig. 3 | The transcriptional signatures IRU CAR-T cells in the presence of CsA *in vitro*.** **a**, GSEA showed the up- and down-regulated gene sets between WT CAR-T (+CsA) and WT/IRU CAR-T (-CsA) groups (n=3 independent experiments). **b,c**, Heatmap demonstrated the differences of cytotoxic and NFAT-regulated molecules among the WT/IRU CAR-T cells with/without CsA (n=3 independent experiments).



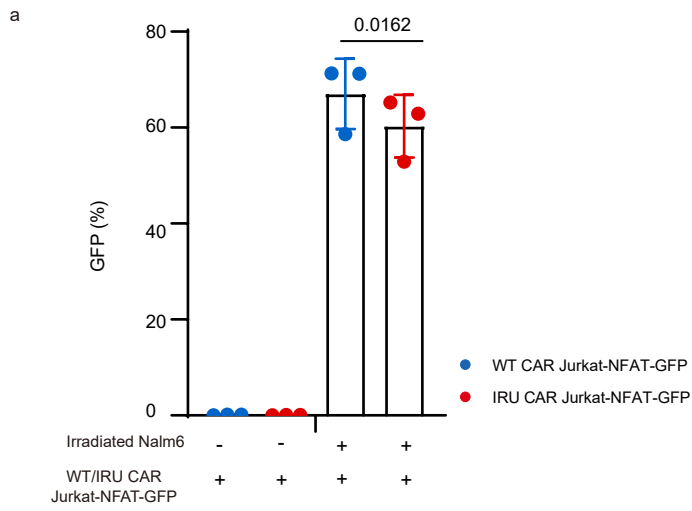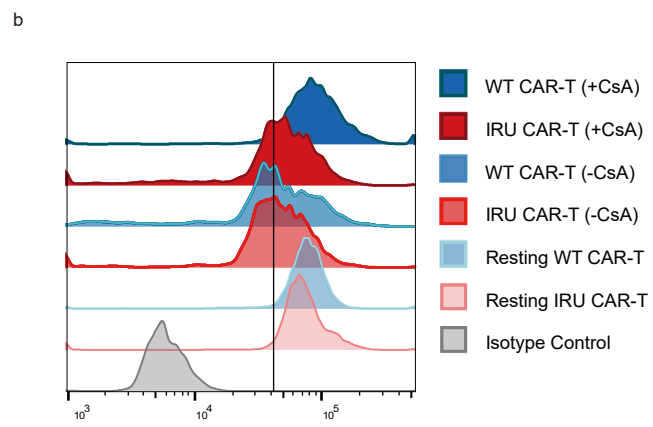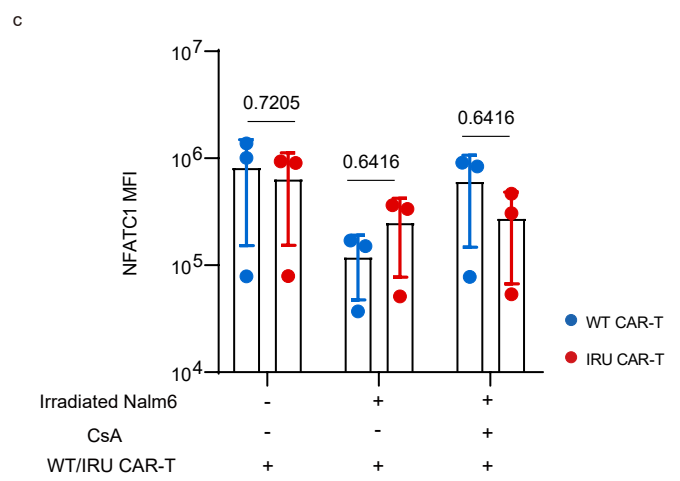

**Supplementary Fig. 4 | WT and mCNA have different efficiencies of dephosphorylation of NFAT signal.** **a**, GFP+ WT CAR-T-Jurkat-NFAT-GFP cells were significantly higher than GFP+ IRU CAR-T-Jurkat-NFAT-GFP cells, upon the stimulation of Nalm6 (n=3 independent experiments). **b,c**, representative histogram (**b**) and bar graph of MFI (**c**) of the phosphorylated NFATc1 expression in primary WT/IRU CAR-T cells (n=3 biologically independent samples). All data are means±s.d. P values were determined by Multiple t test adjusted by the Holm-Sidak method (**a,c**). WT CAR-T or WT CAR-T Jurkat-NFAT-GFP as blue circle, IRU CAR-T or IRU CAR-T Jurkat-NFAT-GFP as red circle.

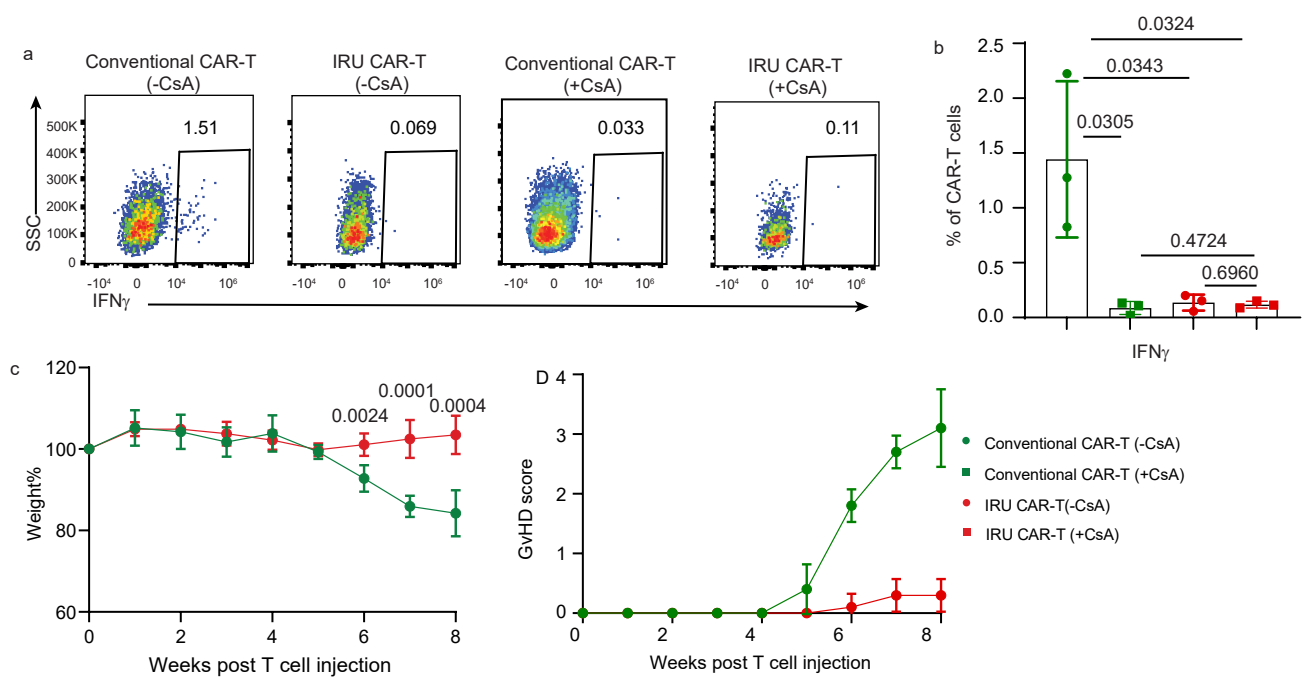

**Supplementary Fig. 5 | GvHD assessment of IRU CAR-T cells *in vitro* and *in vivo*.** **a, b**, Conventional/IRU CAR-T cells were cocultured with recipient PBMCs for 4 days. The IFN $\gamma$  producing CAR-T cells were detected by FACS. Conventional CAR-T cells have functional *TRAC* locus (made by lentivirus infection). Representative FACS flow plots (**a**) and bar graph (**b**) of the frequency of IFN $\gamma$  producing CAR-T cells from conventional/IRU CAR-T cells ( $n=3$  biologically independent samples). **c, d**, Conventional/IRU CAR-T cells were injected into NSG mice. The weight (**c**) and GvHD score (**d**) of each mouse was assessed every week ( $n=5$  animals). All data are means $\pm$ s.d. P values were determined by Multiple t test adjusted by the Holm-Sidak method (**a, c**). Conventional CAR-T (-CsA) as green circle, Conventional CAR-T (+CsA) as green square, IRU CAR-T (-CsA) as red circle and IRU CAR-T (+CsA) as red square.

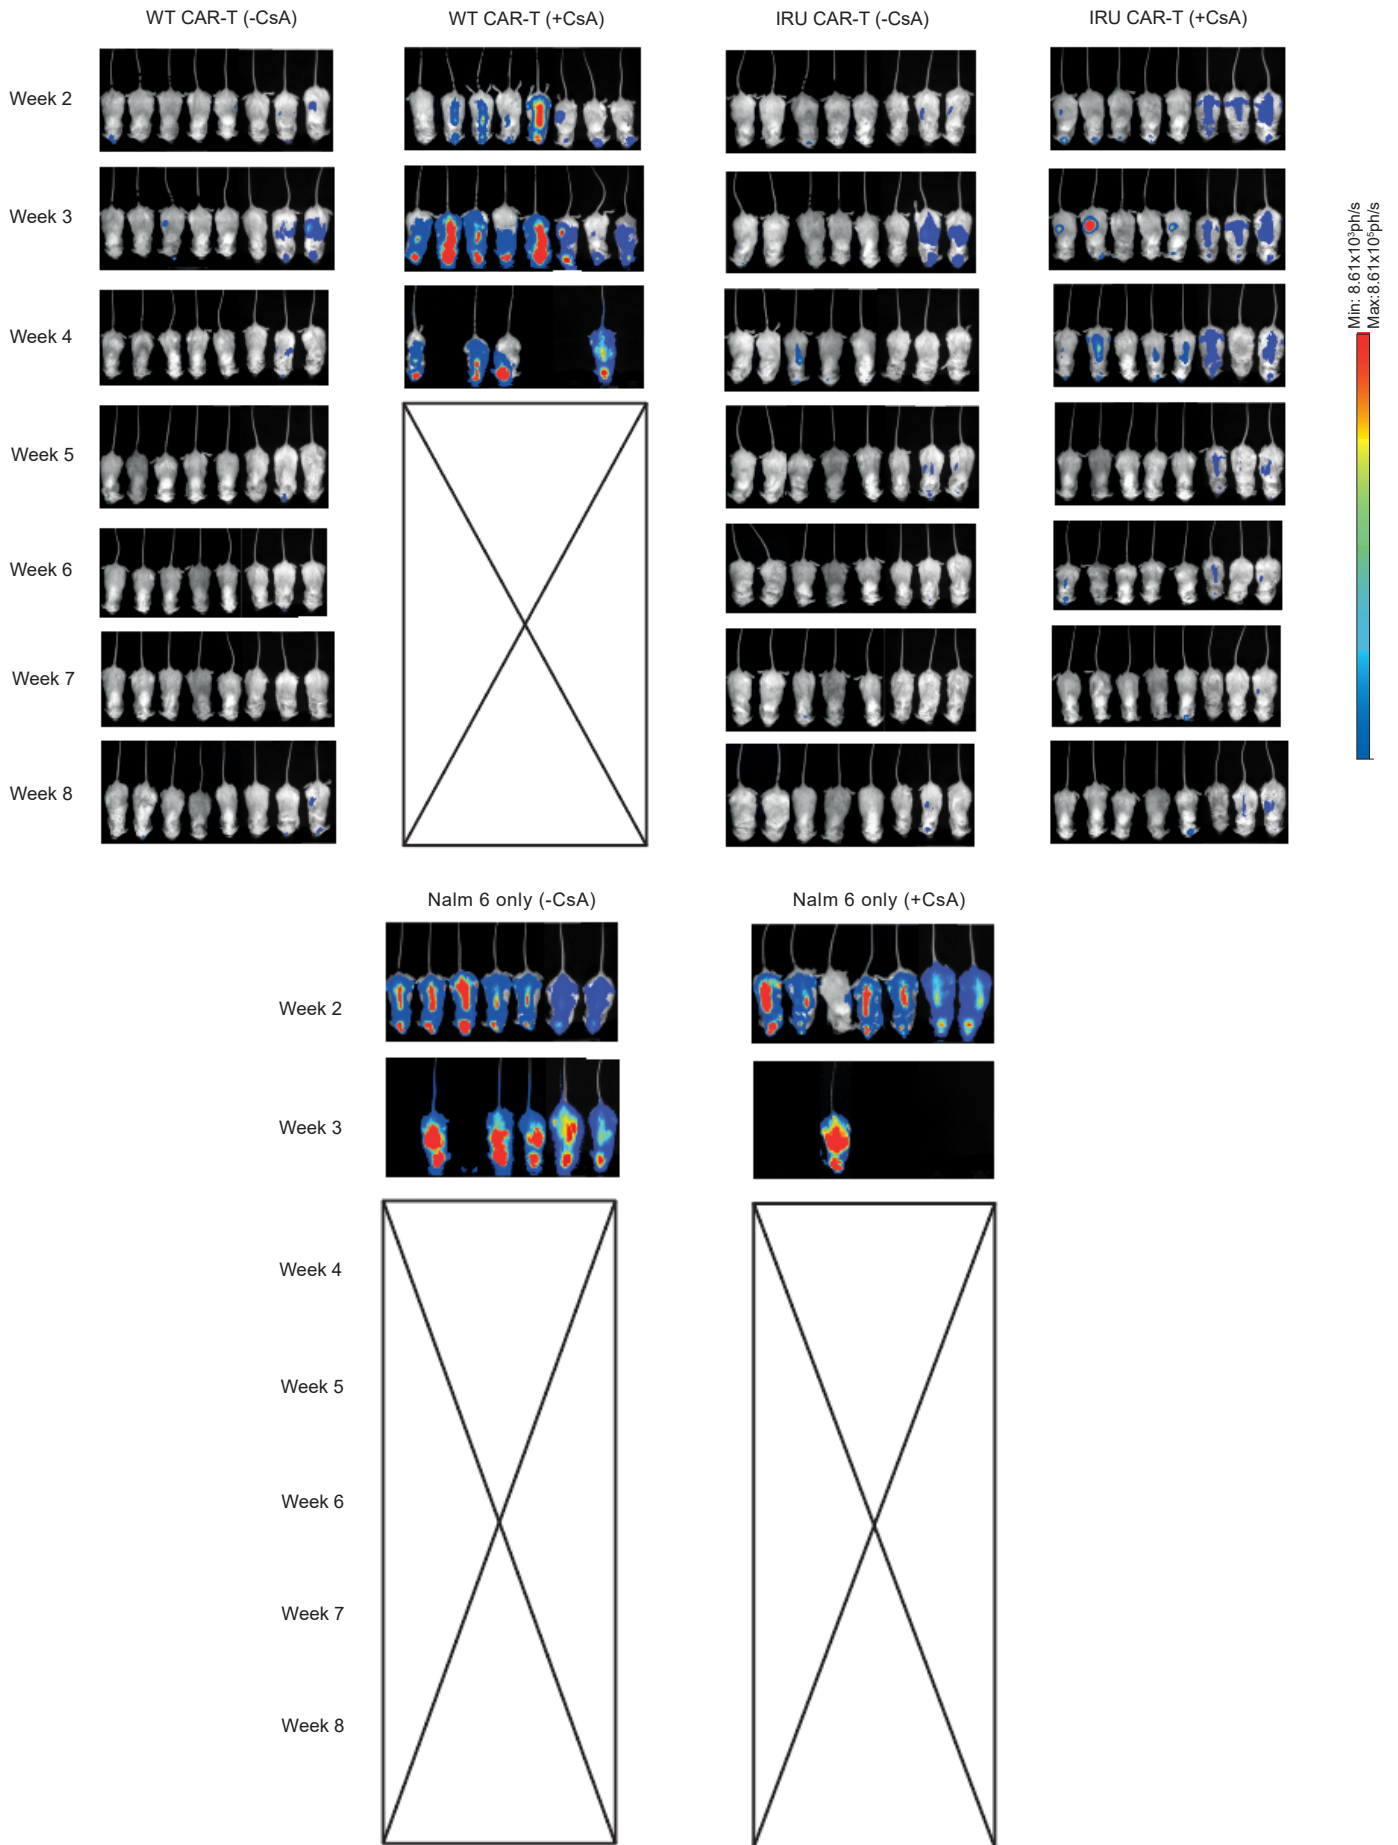

**Supplementary Fig. 6 | Light emission detection showed the tumor progression in mice treated without or with CAR-T cells (WT/IRU CAR,  $\pm$ CsA) (n=8 animals, 2 batches).**

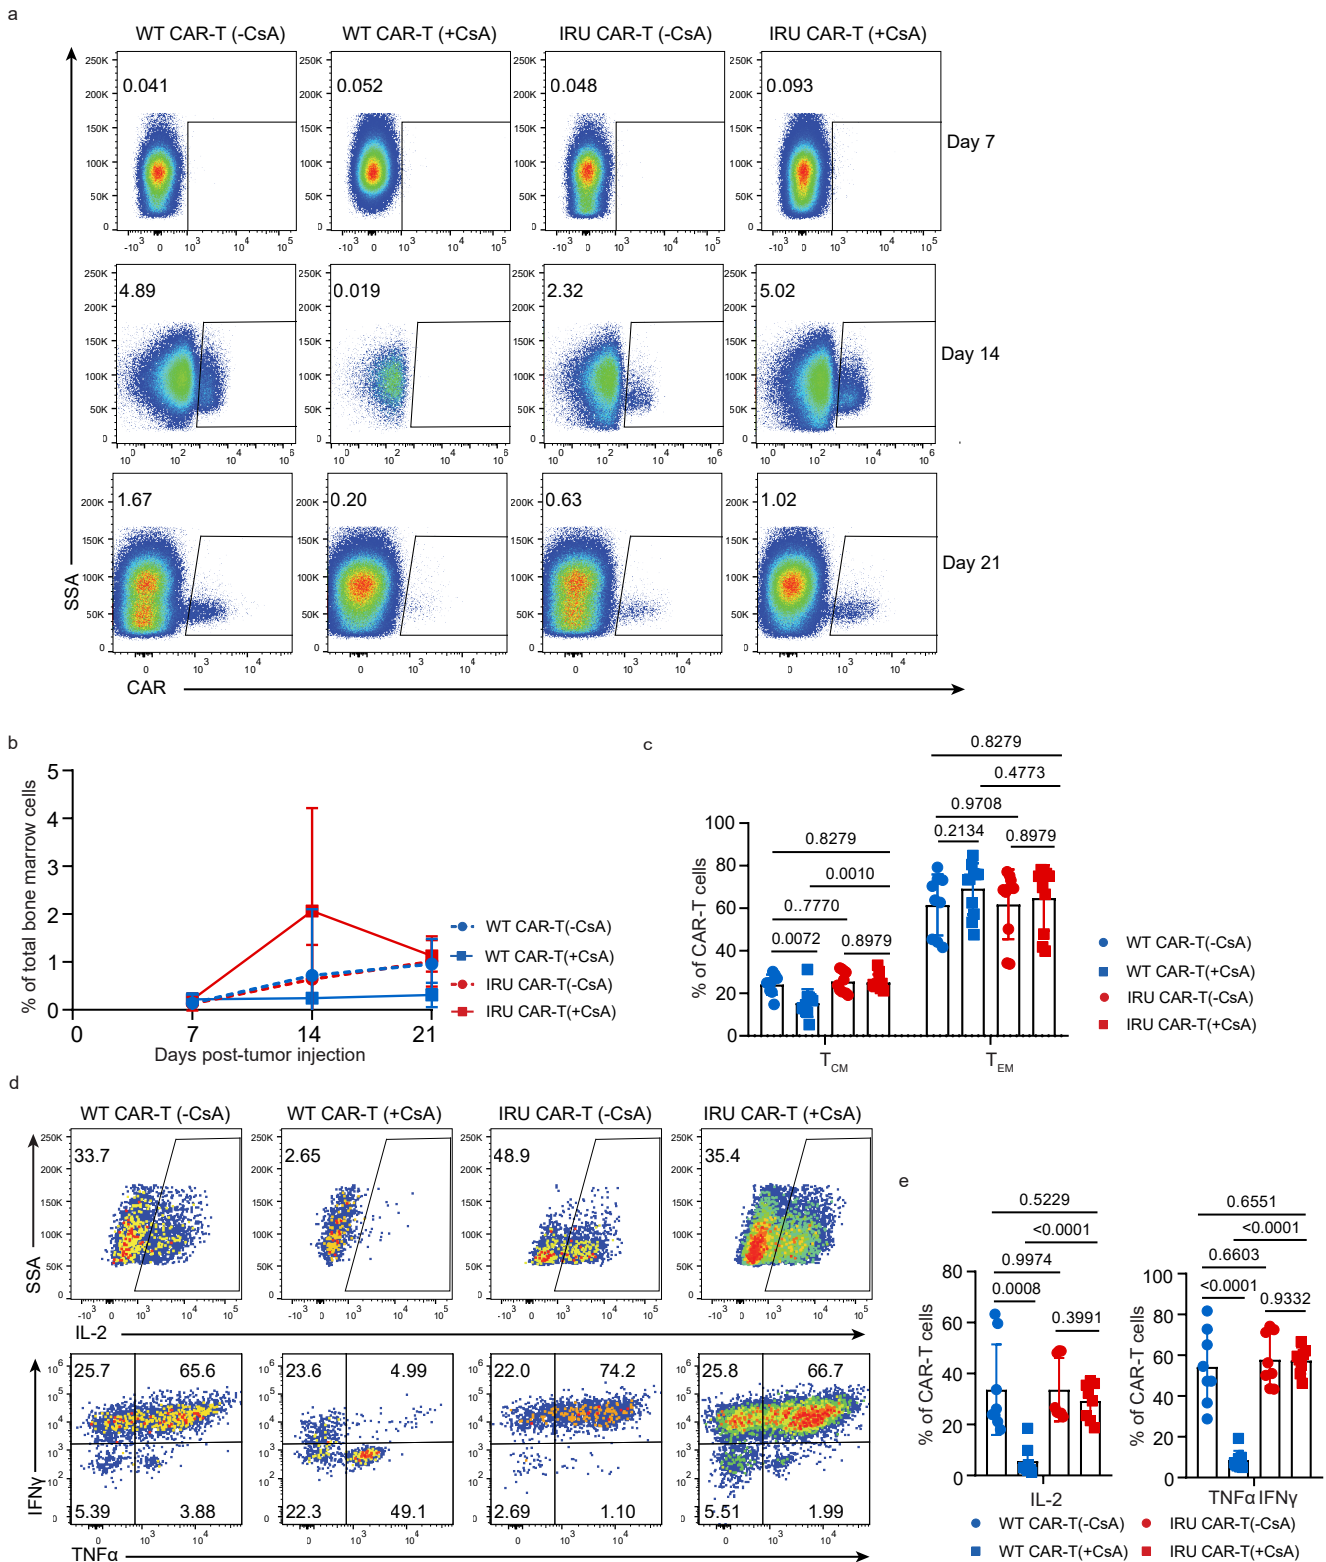

**Supplementary Fig. 7 | IRU CAR-T cells exerted anti-tumor functions in mouse model and their ex vivo status. a-e**, in ex vivo assays, mice in each group were euthanized at day 7, 14 and 21. CAR-T cells in bone marrow were analyzed by FACS. **a-c**, Representative flow plots (**a**) and curve (**b**) of CAR expression at different time points (n=8, 14 and 7 animals at day 7, 14 and 21 respectively in WT CAR-T (-CsA); n=8, 24 and 8 animals at day 7, 14 and 21 respectively in WT CAR-T (+CsA); n=8, 15 and 8 animals at day 7, 14 and 21 respectively in IRU CAR-T (-CsA); n=8, 17 and 8 animals at day 7, 14 and 21 respectively in IRU CAR-T (+CsA)). **c**, the differentiation of IRU CAR-T cells at day 14 (n=9 animals in WT CAR-T (-CsA); n=11 animals in WT CAR-T (+CsA); n=10 animals in IRU CAR-T (-CsA); n=10 animals in IRU CAR-T (+CsA)). **d-e**, Representative flow plots (**d**) and column charts (**e**) showed the cytokine production of IRU CAR-T cells at day 14 (n=8 animals in each group). At least two batches were performed, and indicated in Fig. 3. All data are means±s.d. P values were determined by multiple t test (**c,e**). WT CAR-T (-CsA) as blue circle, WT CAR-T (+CsA) as blue square, IRU CAR-T (-CsA) as red circle and IRU CAR-T (+CsA) as red square.

a

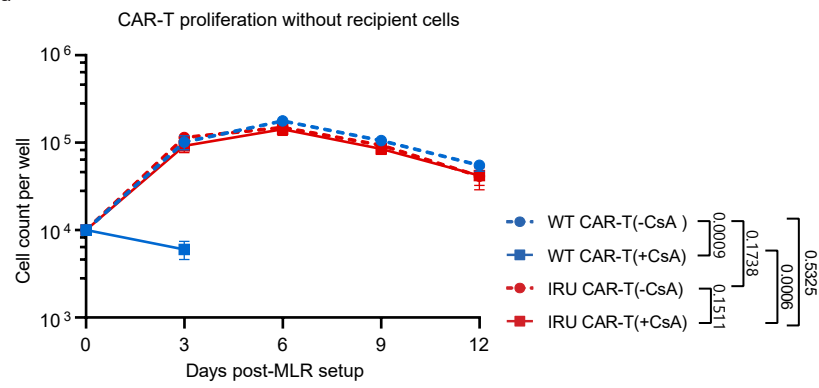

b

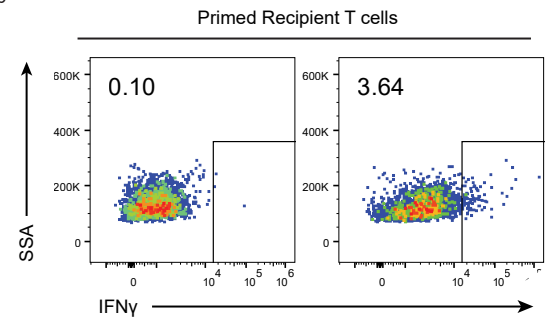

**Supplementary Fig. 8 | IRU CAR-T cells can proliferate in the presence of CsA and RTCs can produce IFN $\gamma$  against CAR-T cells after primed by donor PBMCs.** **a**, CAR-T proliferation without recipient T cells (n=3 biologically independent samples). **b**, The IFN $\gamma$  producing cell percentage of RTCs after primed by donor PBMCs for 6 days. Left: RTCs that were not primed by donor PBMCs. Right: RTCs that were primed by donor PBMCs. All data are means $\pm$ s.d. P values were determined by Multiple t test adjusted by the Holm-Sidak method (**a**). WT CAR-T (-CsA) as blue circle, WT CAR-T (+CsA) as blue square, IRU CAR-T (-CsA) as red circle and IRU CAR-T (+CsA) as red square.

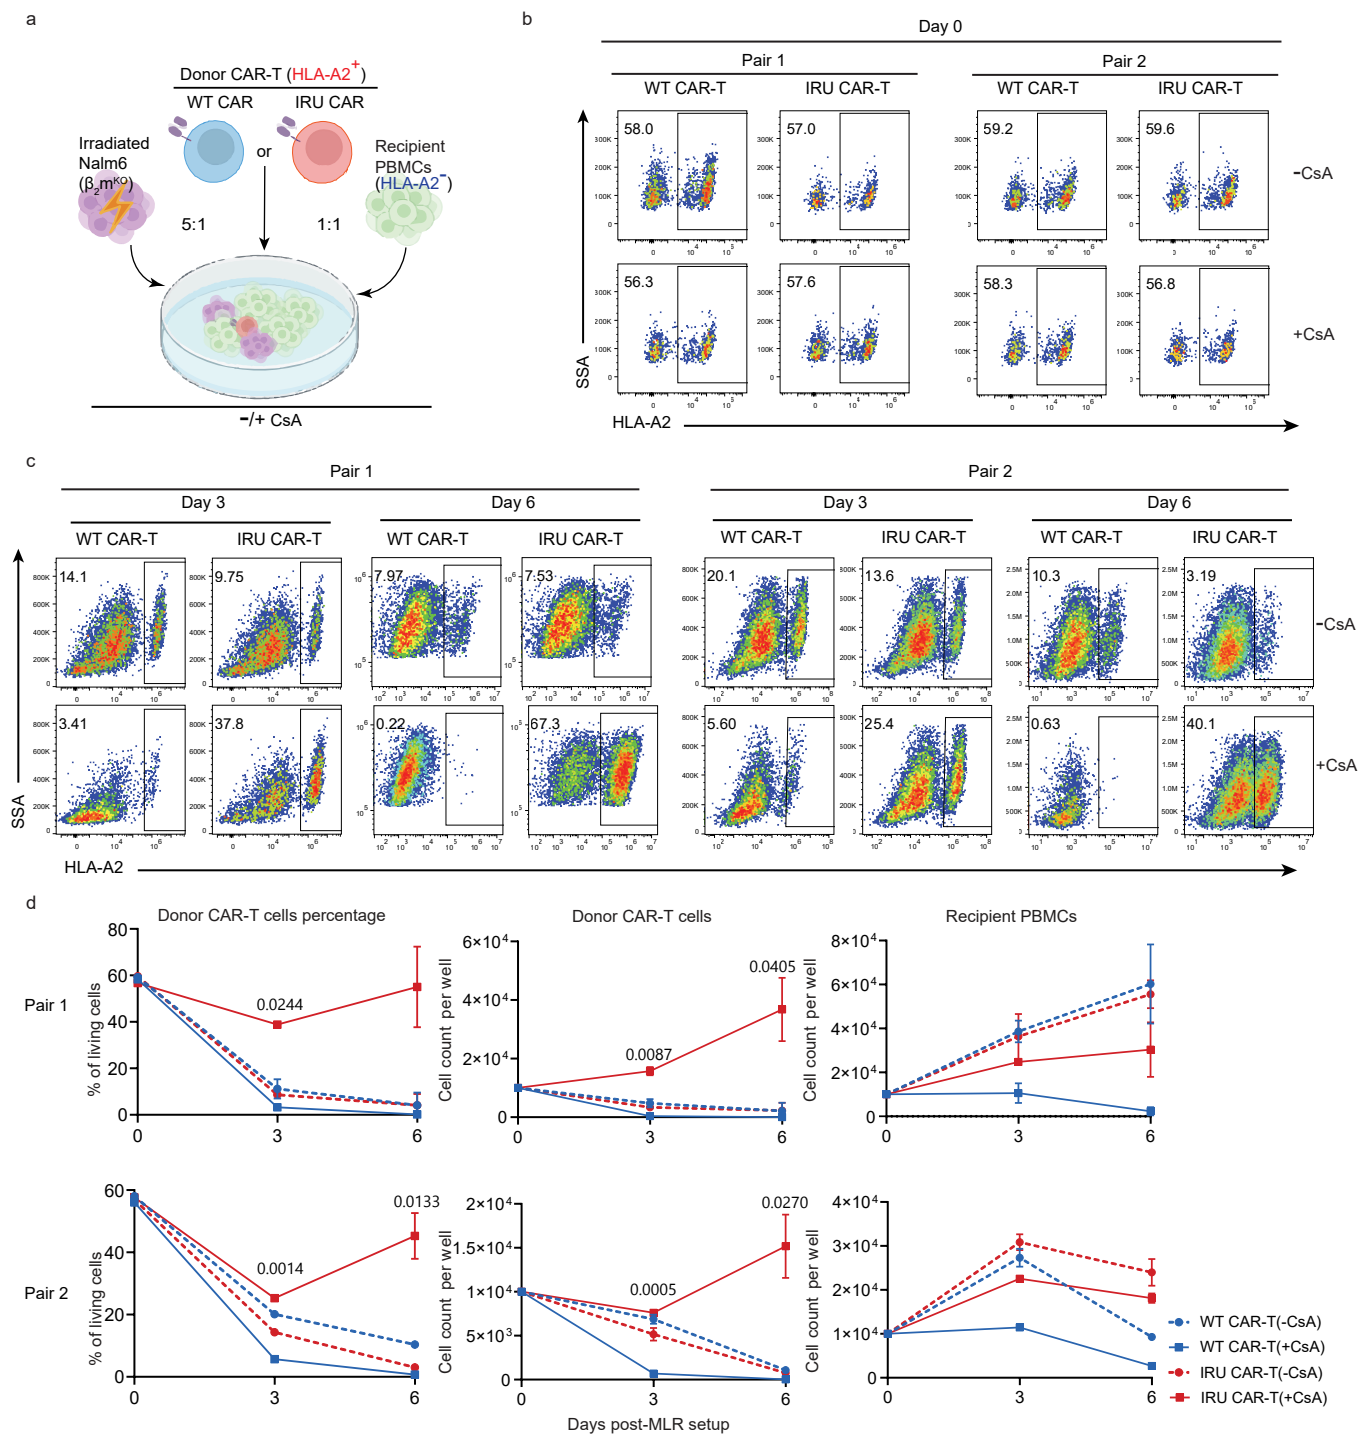

**Supplementary Fig. 9 | IRU CAR-T cells retained effector functions in the presence of allogeneic cells *in vitro* in different donor-recipient pairs.** **a**, Schematic of MLR-PBMCs for **b-d** ( $n = 2$  technical replicates per group). Two pairs of donor CAR-T (WT/IRU CAR; HLA-A2+) and 10-fold recipient PBMCs (HLA-A2-) were mixed respectively upon the stimulation of 5-fold irradiated (50 Gy) Nalm6-FFLuc-GFP in the presence/absence of CsA. **b-c**, Representative flow plots (**b**, **c**) and a curve chart showing percentage of donor CAR-T cells (**d**, left) on day 0, 3 and 6, and curve charts of absolute cell counts of donor CAR-T cells (**d**, middle) and recipient PBMCs (**d**, right). All data are means  $\pm$  s.d. P values were determined by Multiple t test adjusted by the Holm-Sidak method (**d**). WT CAR-T (-CsA) as blue circle, WT CAR-T (+CsA) as blue square, IRU CAR-T (-CsA) as red circle and IRU CAR-T (+CsA) as red square.

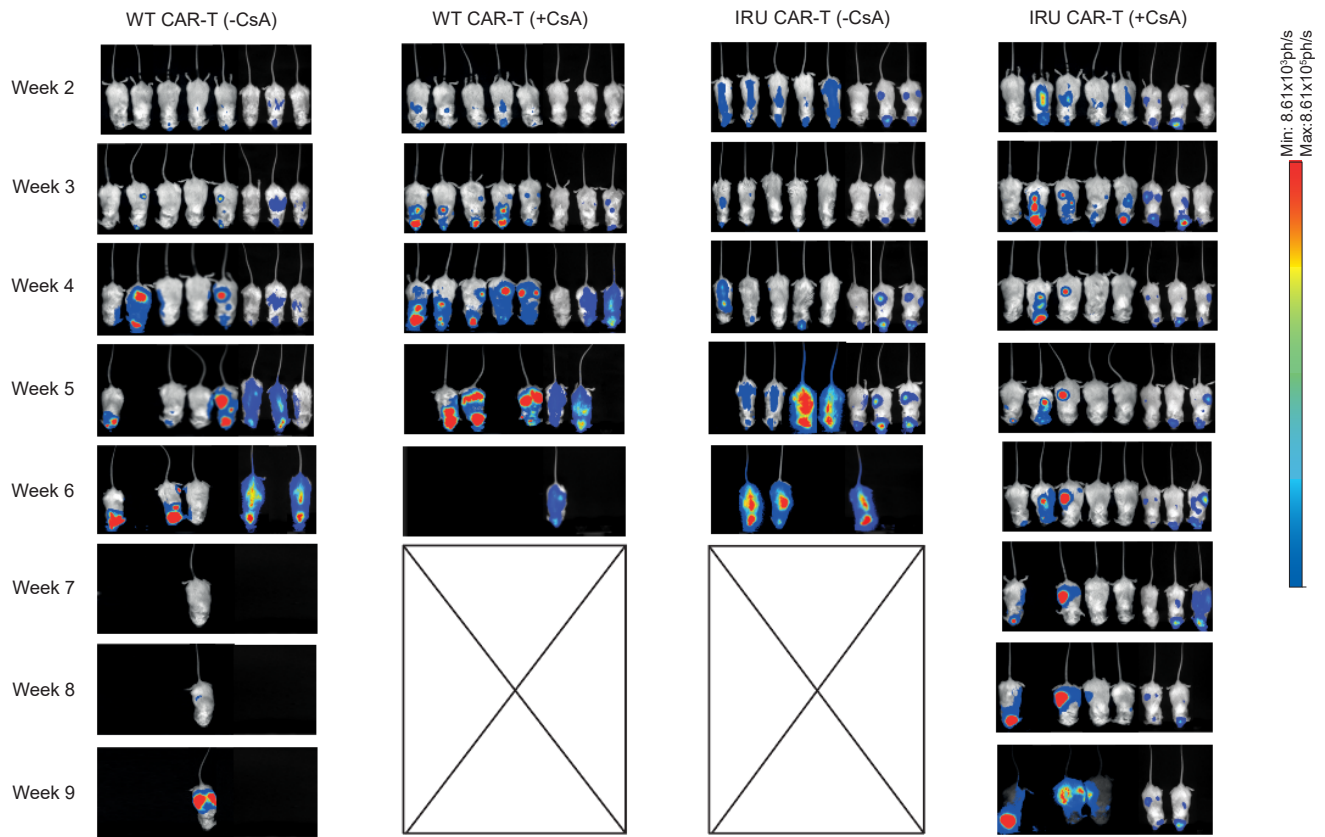

**Supplementary Fig. 10 | Light emission detection showed the tumour progression in mouse systemic T-cell-mediated rejection tumor model (n=8 animals in each group, 2 batches).**



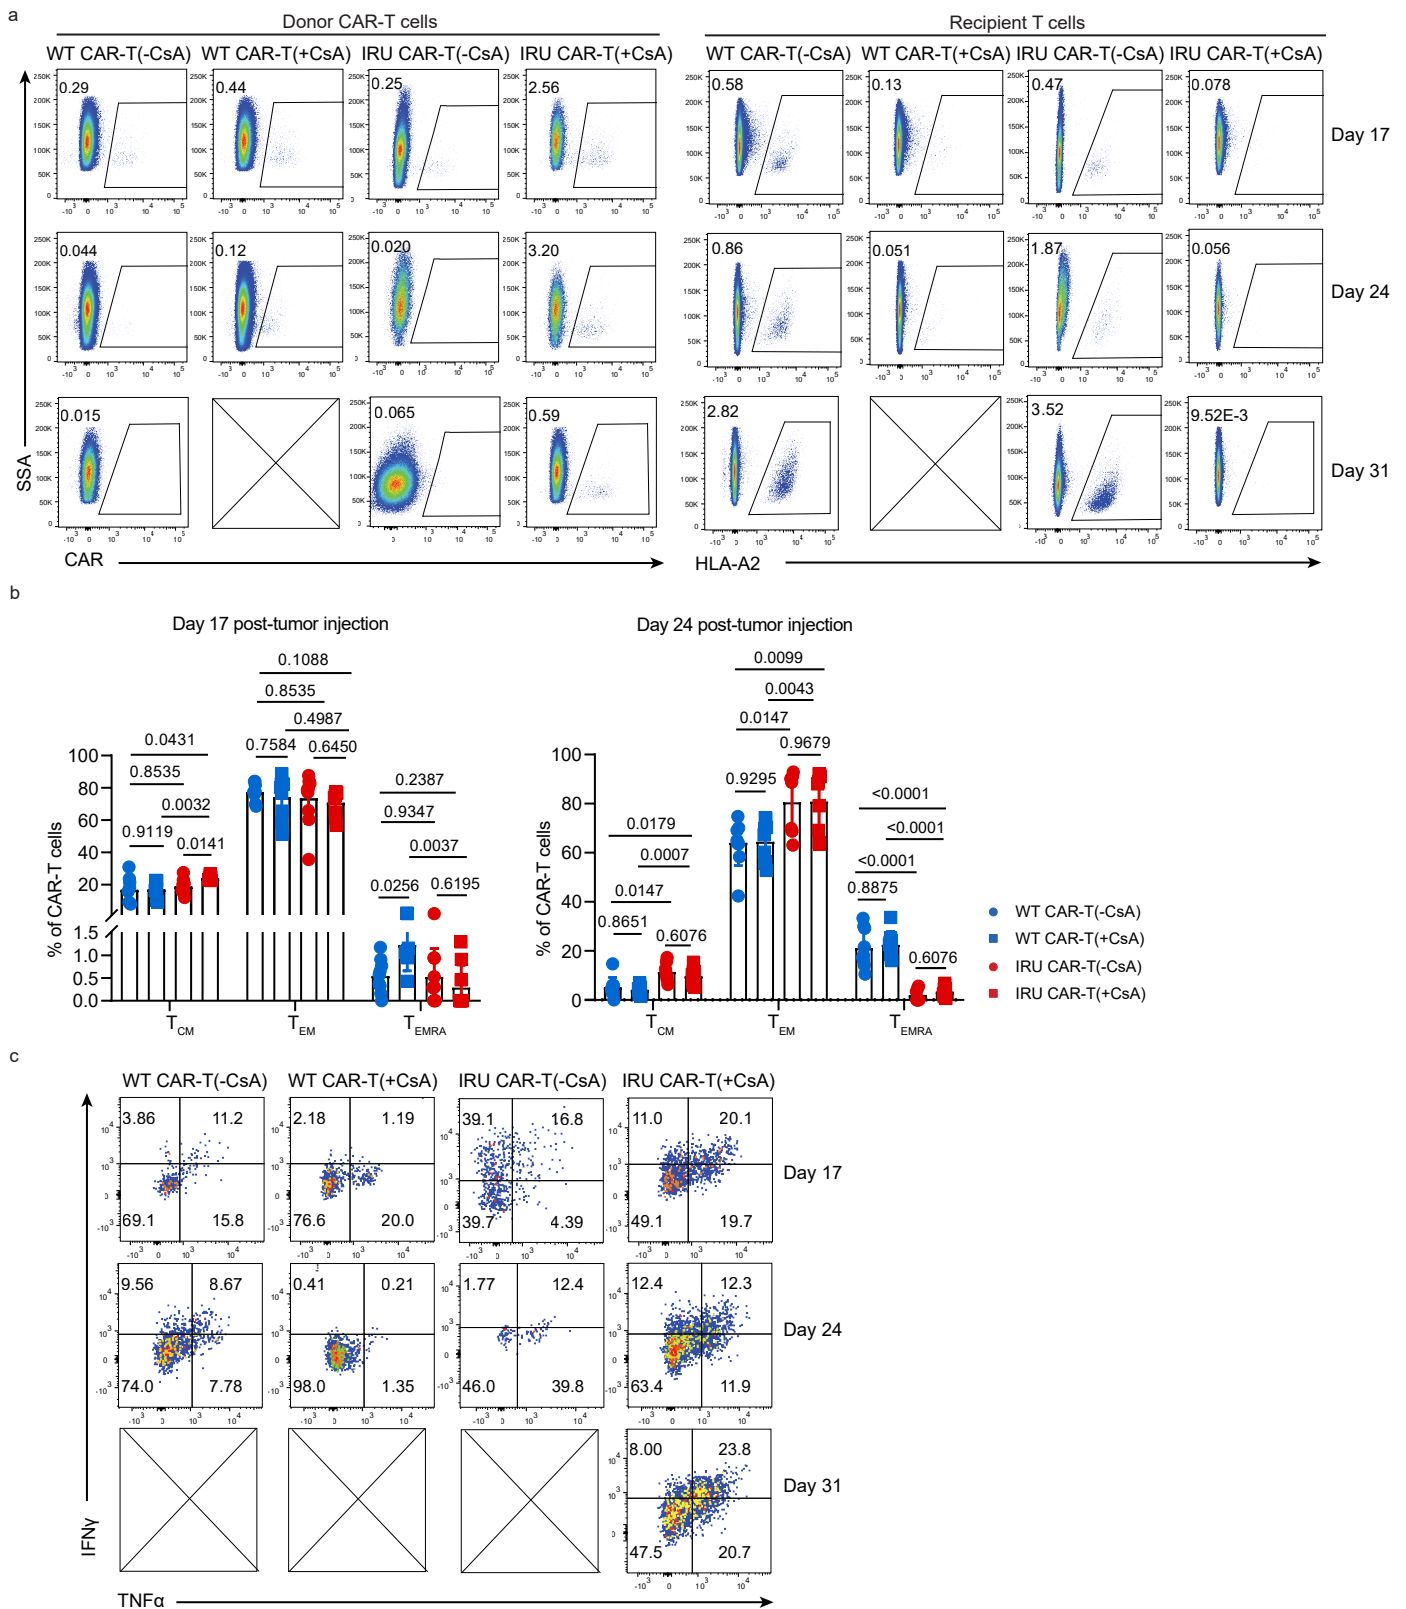

**Supplementary Fig. 11 | IRU CAR-T cells retained efficacies in mouse systemic T-cell-mediated rejection tumor model and *ex vivo* analysis of IRU CAR-T cells in mouse systemic T-cell-mediated rejection tumor model.** In *ex vivo* assays, Mice in each group were euthanized at day17, 24 and 31. CAR-T and RTCs in bone marrow cells were analyzed by FACS. **a**, Representative flow plots of CAR (a, left) and RTCs (HLA-A2<sup>+</sup>, a, right) expression at day 17, 24 and 31. **b**, Phenotype of CAR-T cells (n=9 animals in each group). **c**, Representative flow plots of cytokine production of CAR-T cells in mouse systemic T-cell-mediated rejection tumor model. All data are means $\pm$ s.d. P values were determined by Multiple t test adjusted by the Holm-Sidak method (**b**). WT CAR-T (-CsA) as blue circle, WT CAR-T (+CsA) as blue square, IRU CAR-T (-CsA) as red circle and IRU CAR-T (+CsA) as red square.



a

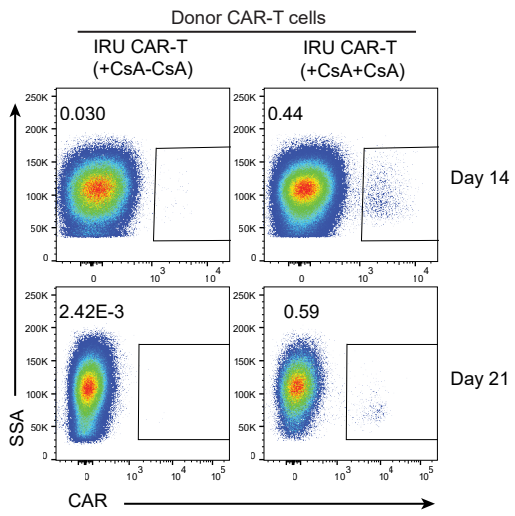

b

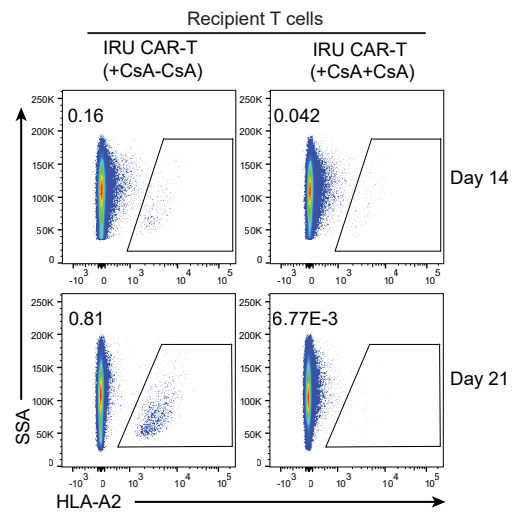

**Supplementary Fig. 12 | *Ex vivo* analysis of IRU CAR-T cells in mouse systemic T-cell-mediated re-challenge rejection tumor model.** Representative flow plots of CAR (a) and RTCs (HLA-A2<sup>+</sup>, b) expression at day 14 and 21.

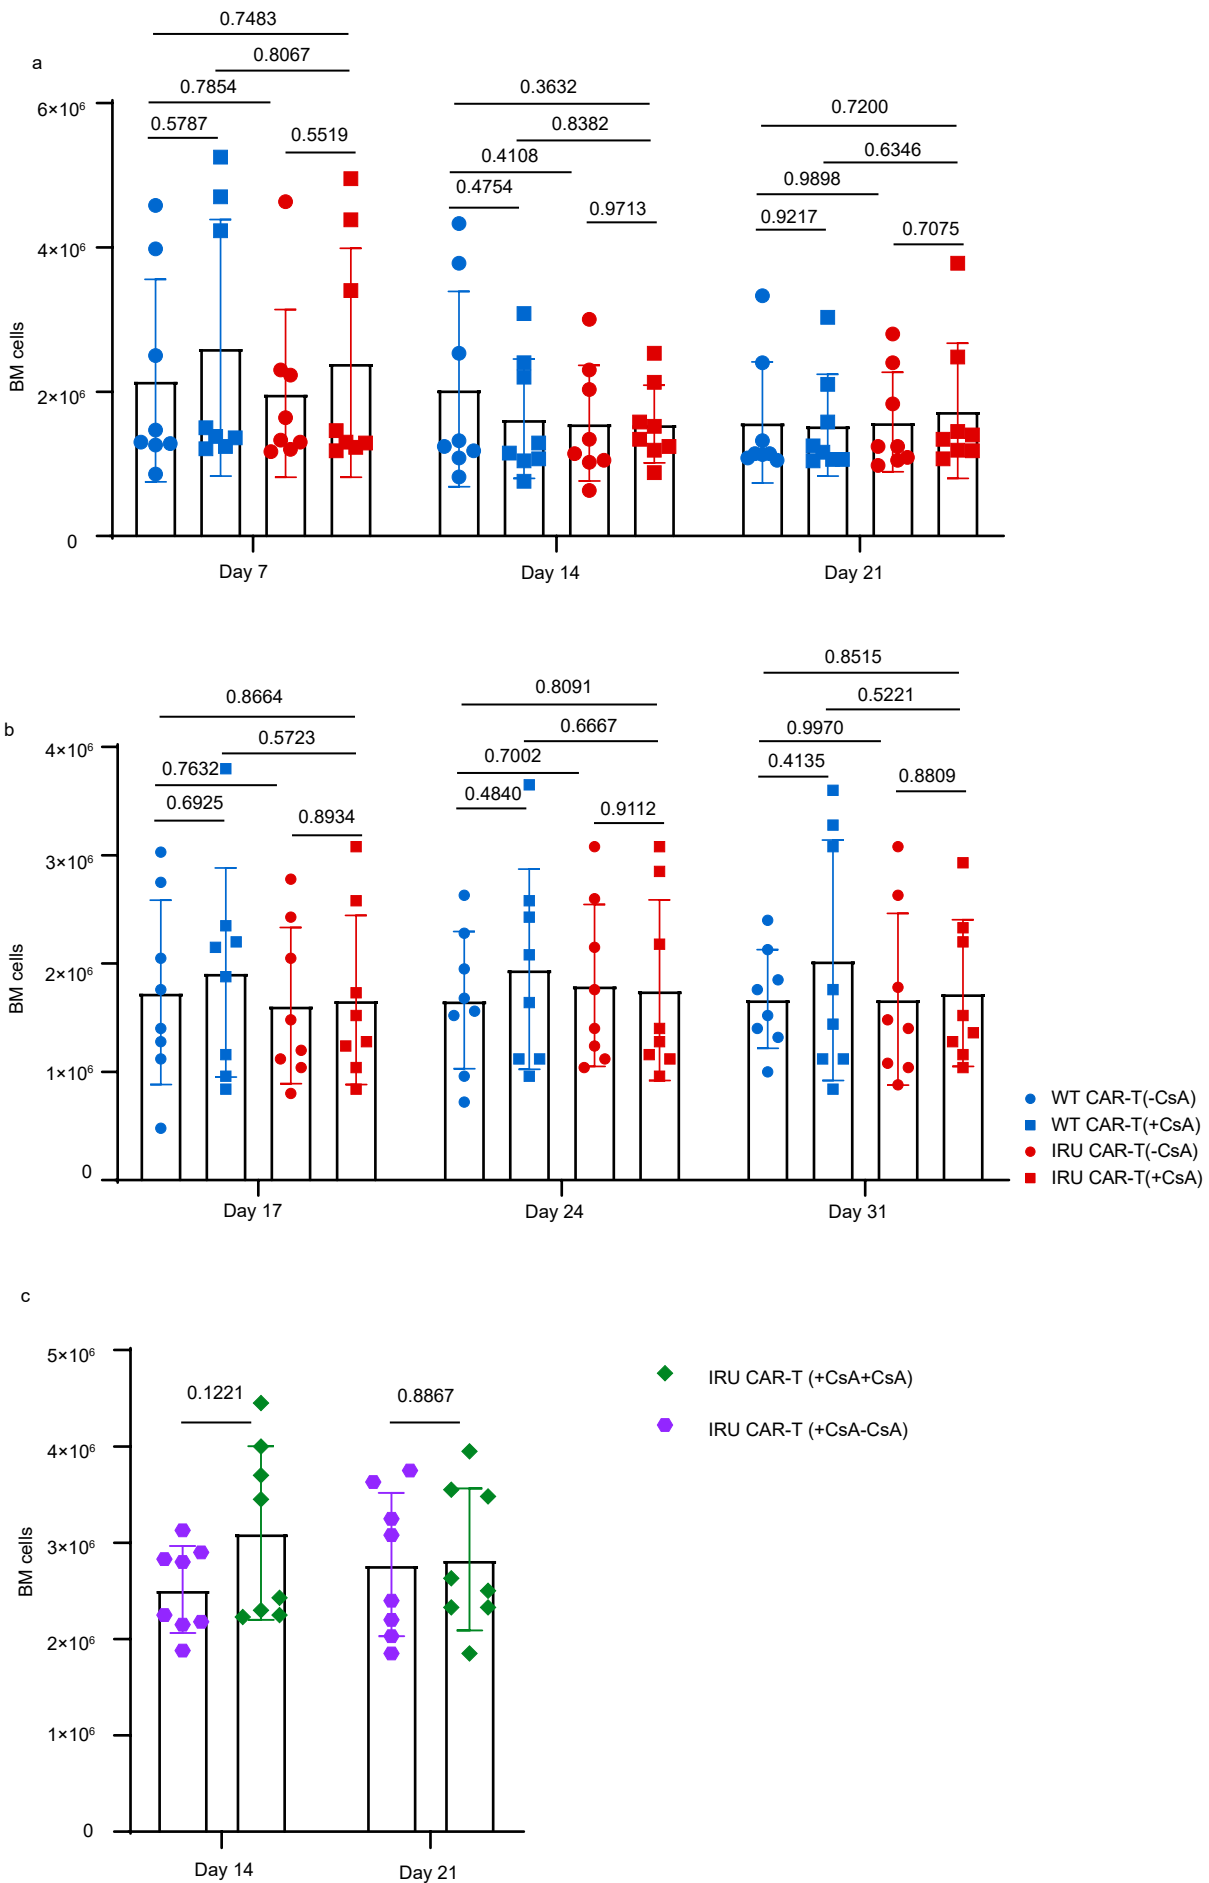

**Supplementary Fig. 13 | Bone marrow cells count in mouse models. a,** Bone marrow cells in ALL mouse models. **b,** Mouse ALL model with RTCs. **c,** Mouse ALL model with rechallenged RTCs. WT CAR-T (-CsA) as blue circle, WT CAR-T (+CsA) as blue square, IRU CAR-T (-CsA) as red circle, IRU CAR-T (+CsA) as red square, IRU CAR-T (+CsA+CsA) as green diamond, and IRU CAR-T (+CsA-CsA) as purple hexagon. P values were determined by multiple t test adjusted by the Holm-Sidak method.

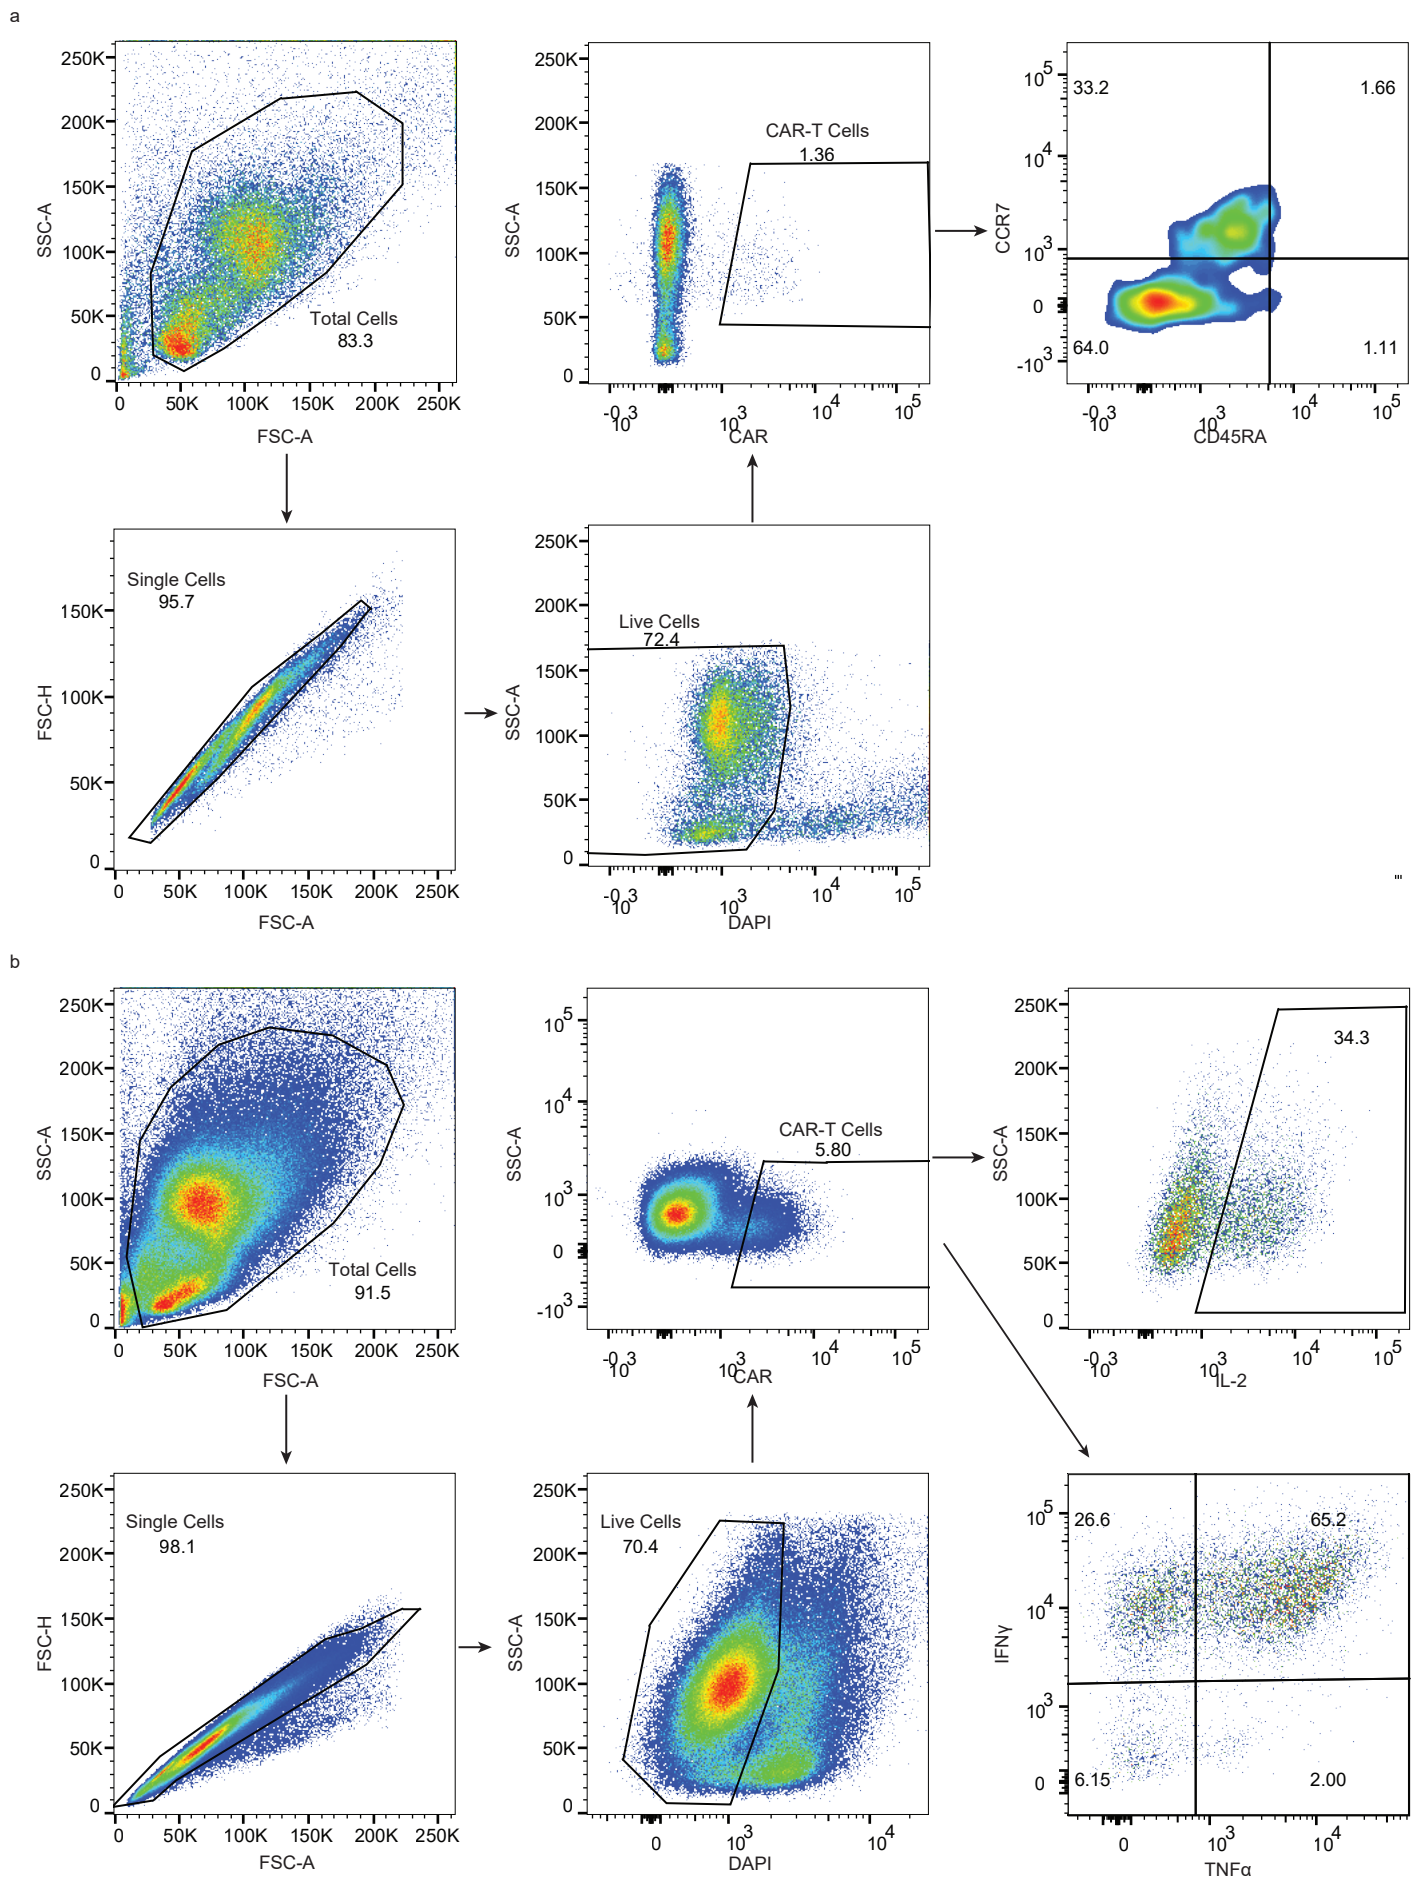

**Supplementary Fig. 14 | Gating strategy in mouse ALL model. a,b,** Representative flow cytometric analysis of phenotype of CAR-T cells in bone marrow (a) and cytokines of CAR-T cells after stimulation with PMA/Ionomycin for 4 hrs (b). Placement of gating was based on FMO controls.

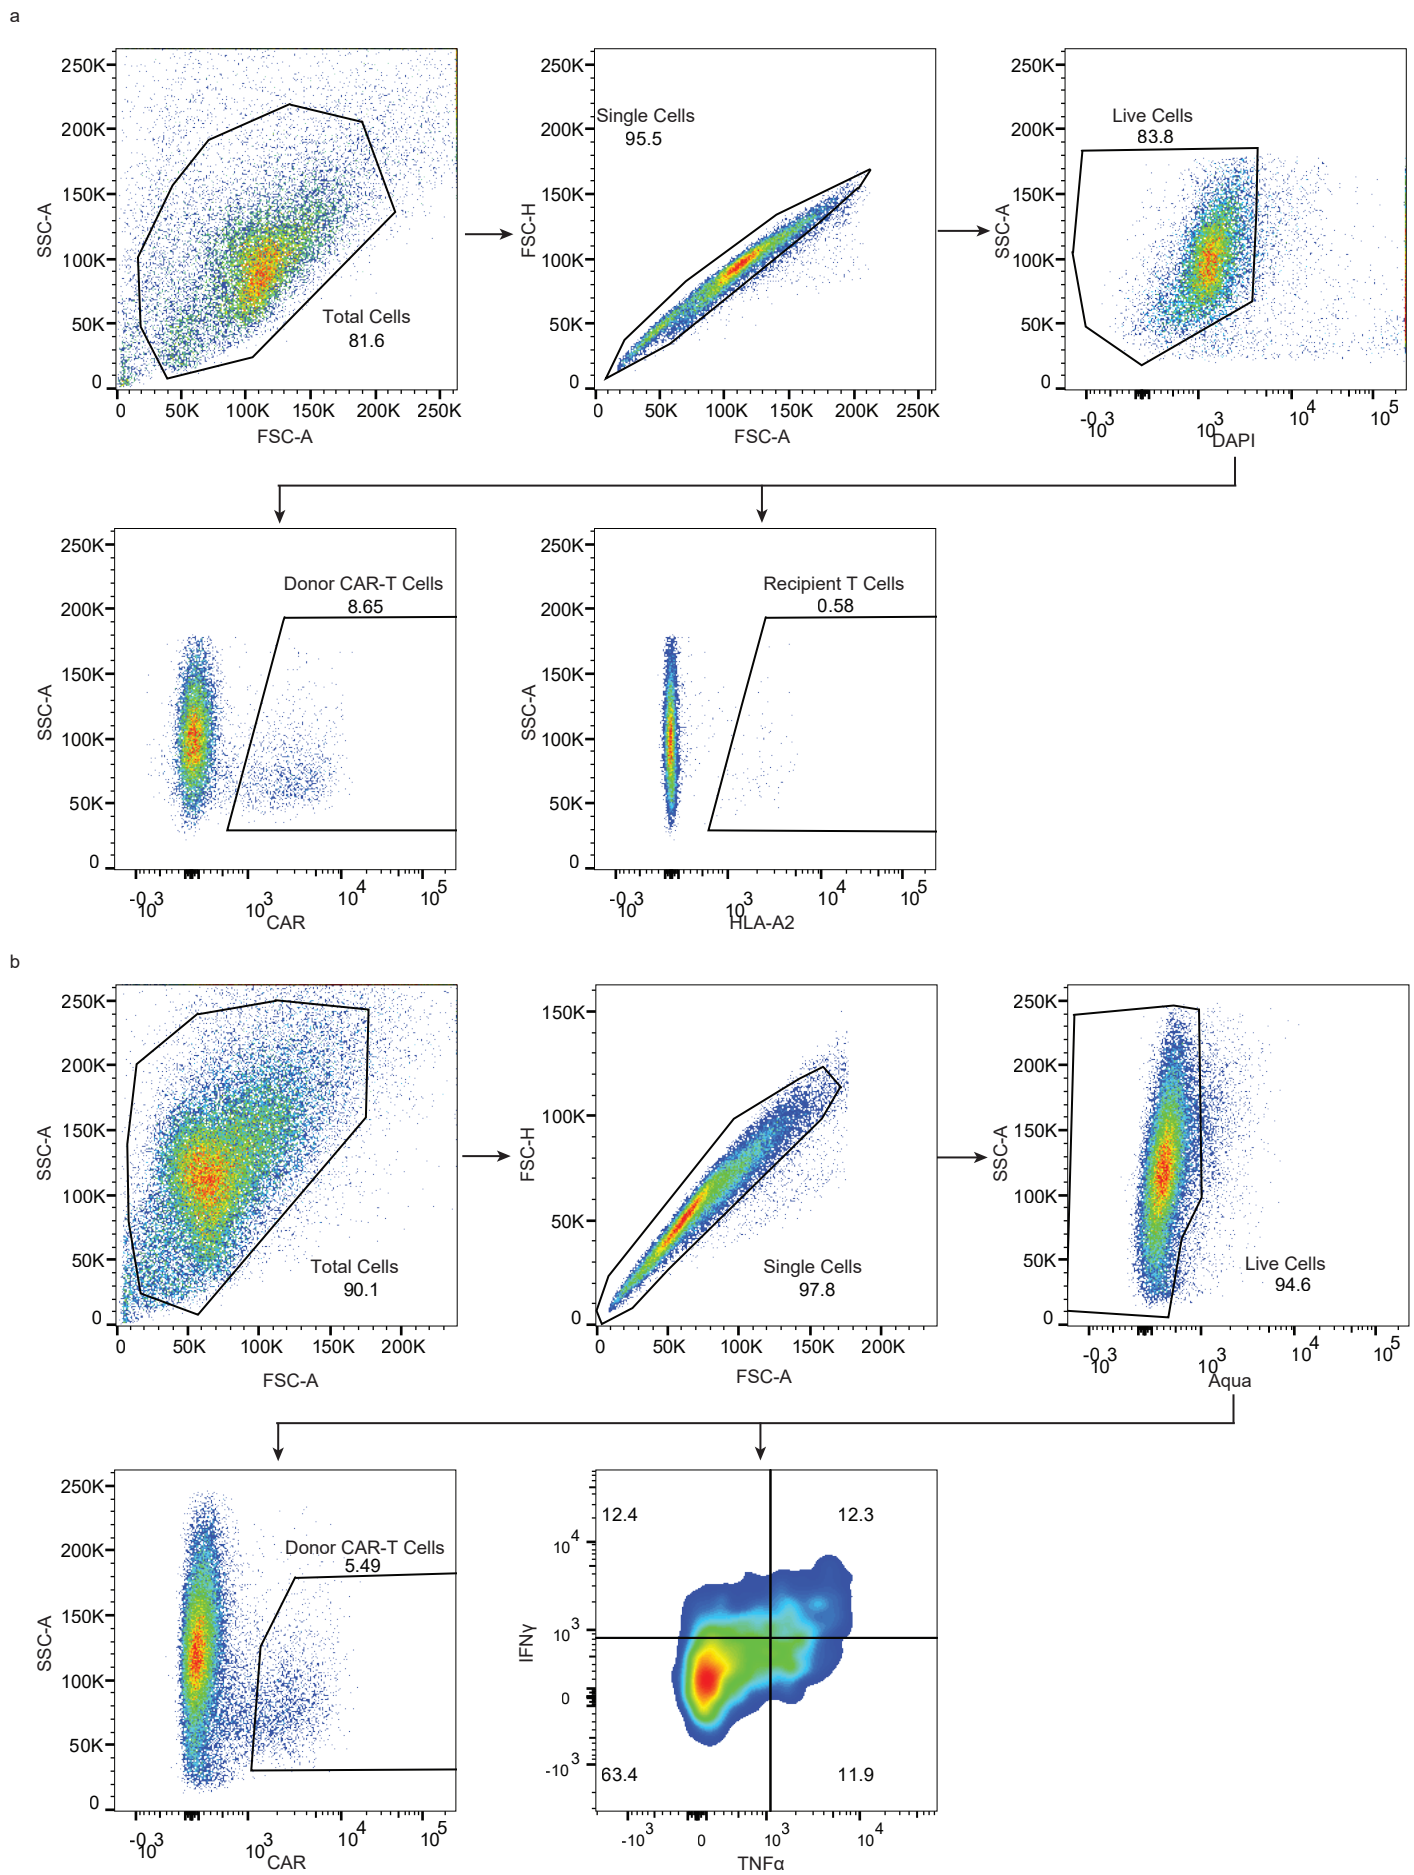

**Supplementary Fig. 15 | Gating strategy in mouse ALL model with RTCs. a,b,** Representative flow cytometric analysis of donor CAR-T and recipient T cells in bone marrow (a) and cytokines of donor CAR-T cells after stimulation with PMA/Ionomycin for 4 hrs (b). Placement of gating was based on FMO controls.

**Table 1: Primers for qPCR.**

| ID | Primer Name | Primer sequence (5'to3') |
|----|-------------|--------------------------|
| 1  | IL2-F       | AGAACTCAAACCTCTGGAGGAAG  |
| 2  | IL2-R       | GCTGTCTCATCAGCATATTCACAC |
| 3  | IFNG-F      | GAGTGTGGAGACCATCAAGGAAG  |
| 4  | IFNG-R      | TGCTTTGCGTTGGACATTCAAGTC |
| 5  | TNF-F       | CTCTTCTGCCTGCTGCACTTTG   |
| 6  | TNF-R       | ATGGGCTACAGGCTTGTCACTC   |
| 7  | IL5-F       | GGAATAGGCACACTGGAGAGTC   |
| 8  | IL5-R       | CTCTCCGTCTTTCTTCTCCACAC  |
| 9  | IL3-F       | AAGCAGCCACCTTTGCCTTTGC   |
| 10 | IL3-R       | ACAGCCCTGTTGAATGCCTCCA   |
| 11 | CDC25A-F    | TCTGGACAGCTCCTCTCGTCAT   |
| 12 | CDC25A-R    | ACTTCCAGGTGGAGACTCCTCT   |
| 13 | ATM-F       | TGTTCCAGGACACGAAGGGAGA   |
| 14 | ATM-R       | CAGGGTTCTCAGCACTATGGGA   |
| 15 | NTRK1-F     | CACTAACAGCACATCTGGAGACC  |
| 16 | NTRK1-R     | TGAGCACAAGGAGCAGCGTAGA   |
| 17 | CDK4-F      | CCATCAGCACAGTTCGTGAGGT   |
| 18 | CDK4-R      | TCAGTTCGGGATGTGGCACAGA   |
| 19 | CSF2-F      | GGAGCATGTGAATGCCATCCAG   |
| 20 | CSF2-R      | CTGGAGGTCAAACATTTCTGAGAT |
| 21 | GZMB-F      | CGACAGTACCATTGAGTTGTGCG  |
| 22 | GZMB-R      | TTCGTCCATAGGAGACAATGCCC  |
| 23 | B2M-F       | CCACTGAAAAAGATGAGTATGCCT |
| 24 | B2M-R       | CCAATCCAAATGCGGCATCTTCA  |
